# Supplementary material for: Blocking recombination centers by controlling the charge density of a sulfur vacancy in antimony trisulfide
Source: Royal Society of Chemistry journal article supplement (doi:10.1039/d3cp05217f), 2023-01-01
Supplement: d3cp05217f1.pdf [file d3cp05217f1.pdf]

Supporting Information for:

## Blocking recombination centers by controlling the charge density of sulfur vacancy in antimony trisulfide

Xiao Han, Qi Zhao, Xiaodan, Yan, Ting Meng\*, Jinlu He\*

*College of Chemistry and Chemical Engineering, Inner Mongolia University, Hohhot*

*010021, PR China*

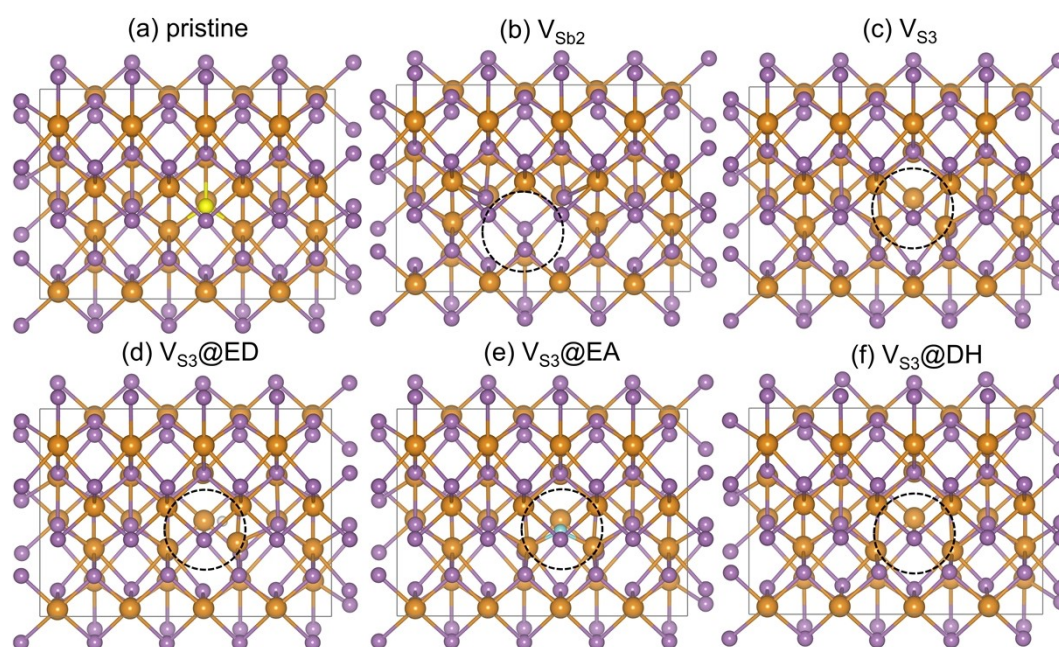

**Fig. S1** Side views of optimized geometries for (a) pristine  $\text{Sb}_2\text{S}_3$ , (b)  $V_{\text{Sb}2}$ , (c)  $V_{\text{S}3}$ , (d)  $V_{\text{S}3}@ED$ , (e)  $V_{\text{S}3}@EA$  and (f)  $V_{\text{S}3}@DH$  systems. The Sb, S, O and H atoms are colored in orange, purple, light blue and white, respectively. The removed sulfur atom is colored in yellow for pristine  $\text{Sb}_2\text{S}_3$  system. The dotted line circle denote the defect and elements doping region.

---

\* Corresponding author, E-mail: t.meng@imu.edu.cn; hejinlu@imu.edu.cn.

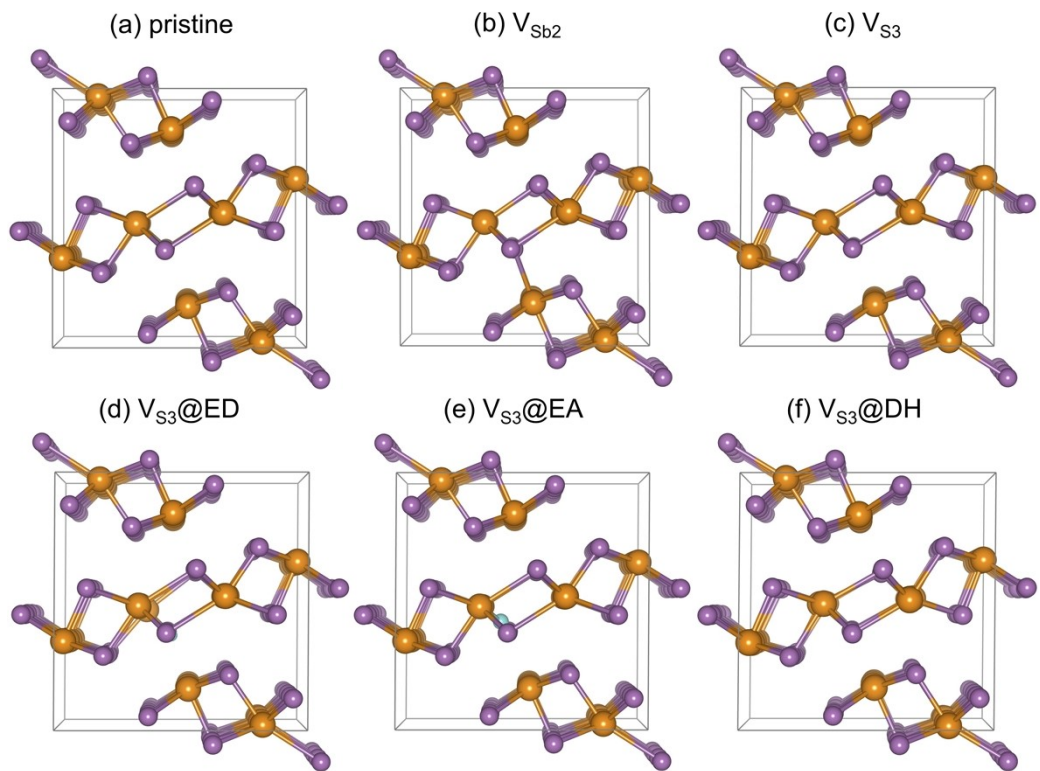

**Fig. S2** Top views of optimized geometries for (a) pristine  $\text{Sb}_2\text{S}_3$ , (b)  $V_{\text{Sb}_2}$ , (c)  $V_{\text{S}_3}$ , (d)  $V_{\text{S}_3@\text{ED}}$ , (e)  $V_{\text{S}_3@\text{EA}}$  and (f)  $V_{\text{S}_3@\text{DH}}$  systems. The Sb, S, O, and H atoms are colored in orange, purple, light blue and white, respectively. The removed sulfur atom is colored in yellow for pristine  $\text{Sb}_2\text{S}_3$  system.

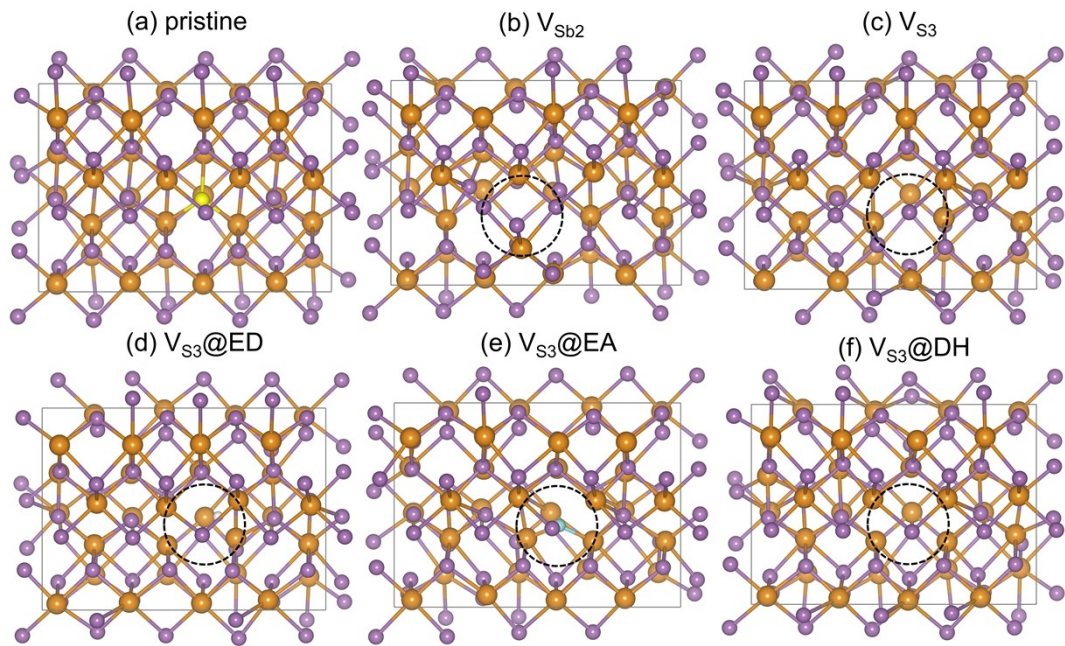

**Fig. S3** Side views of representative geometries of 4 ps MD trajectories for (a) pristine  $\text{Sb}_2\text{S}_3$ , (b)  $V_{\text{Sb}_2}$ , (c)  $V_{\text{S}_3}$ , (d)  $V_{\text{S}_3}@ED$ , (e)  $V_{\text{S}_3}@EA$  and (f)  $V_{\text{S}_3}@DH$  systems at 300 K. The Sb, S, O, and H atoms are colored in orange, purple, light blue and white, respectively. The removed sulfur atom is colored in yellow for pristine  $\text{Sb}_2\text{S}_3$  system.

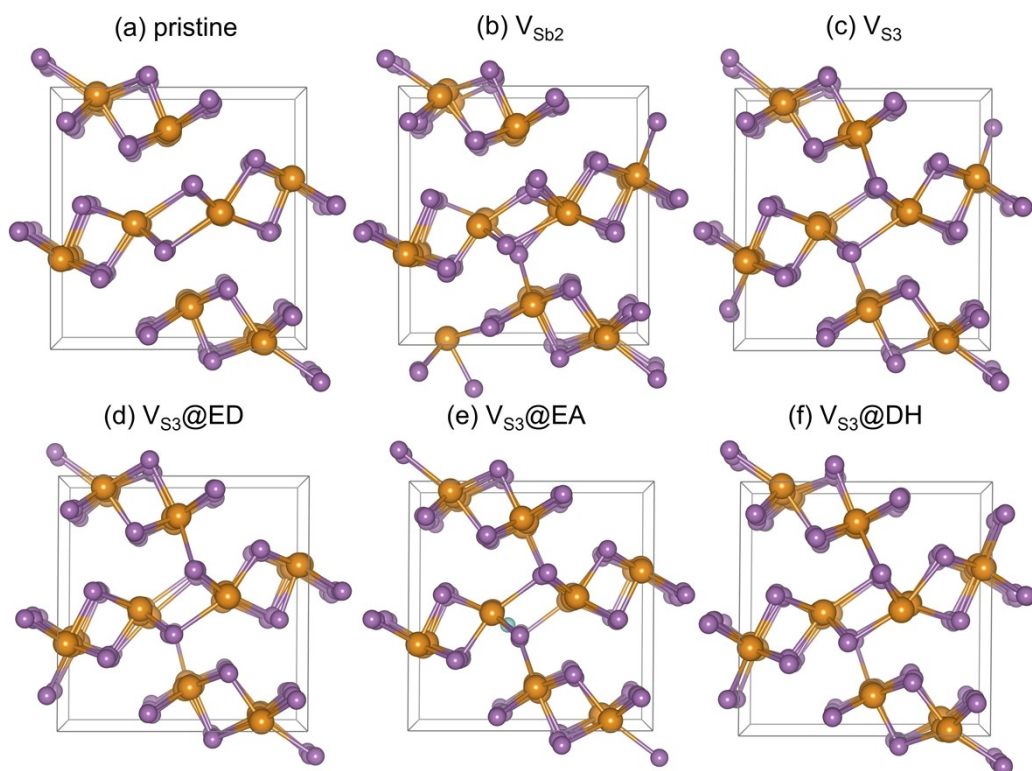

**Fig. S4** Top views of representative geometries of 4 ps MD trajectories for pristine  $\text{Sb}_2\text{S}_3$ ,  $V_{\text{Sb}2}$ ,  $V_{\text{S}3}$ ,  $V_{\text{S}3@\text{ED}}$ ,  $V_{\text{S}3@\text{EA}}$  and  $V_{\text{S}3@\text{DH}}$  systems at 300 K. The Sb, S, O, and H atoms are colored in orange, purple, light blue and white, respectively. The removed sulfur atom is colored in yellow for pristine  $\text{Sb}_2\text{S}_3$  system.

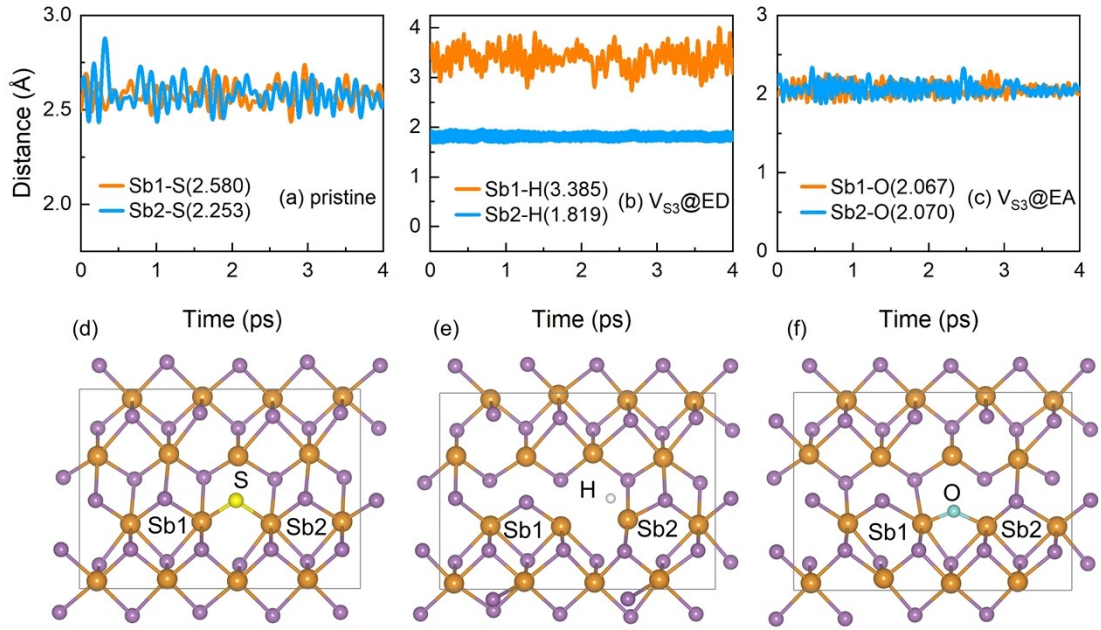

**Fig. S5.** Top panel shows evolution of the Sb-M (M = S, H and O) distances for pristine (a)  $Sb_2S_3$ , (b)  $V_{S_3}@ED$  and (c)  $V_{S_3}@EA$  systems. The bottom panel shows geometries for pristine (a)  $Sb_2S_3$ , (b)  $V_{S_3}@ED$  and (c)  $V_{S_3}@EA$  system. The numbers inside the parentheses are canonically averaged distance of Sb-M bonds. The Sb, S, O, and H atoms are colored in orange, purple, light blue and white, respectively. The removed sulfur atom is colored in yellow for pristine  $Sb_2S_3$  system.

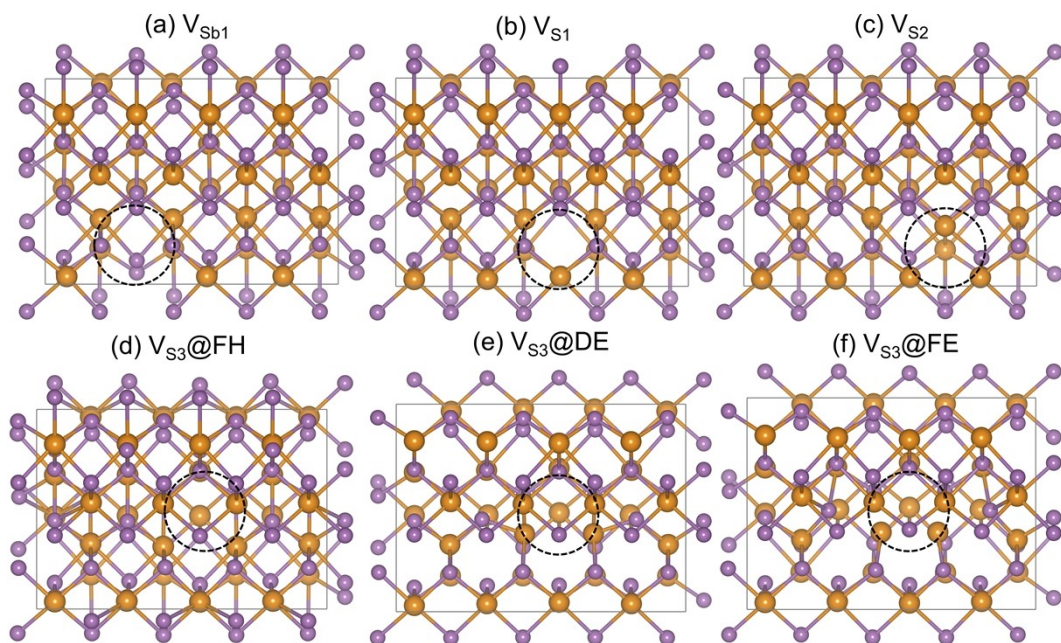

**Fig. S6** Side views of optimized geometries for  $V_{Sb1}$ ,  $V_{S1}$ ,  $V_{S2}$ ,  $V_{S3@FH}$ ,  $V_{S3@DE}$  and  $V_{S3@FE}$  systems. The Sb and S atoms are colored in orange and purple, respectively.

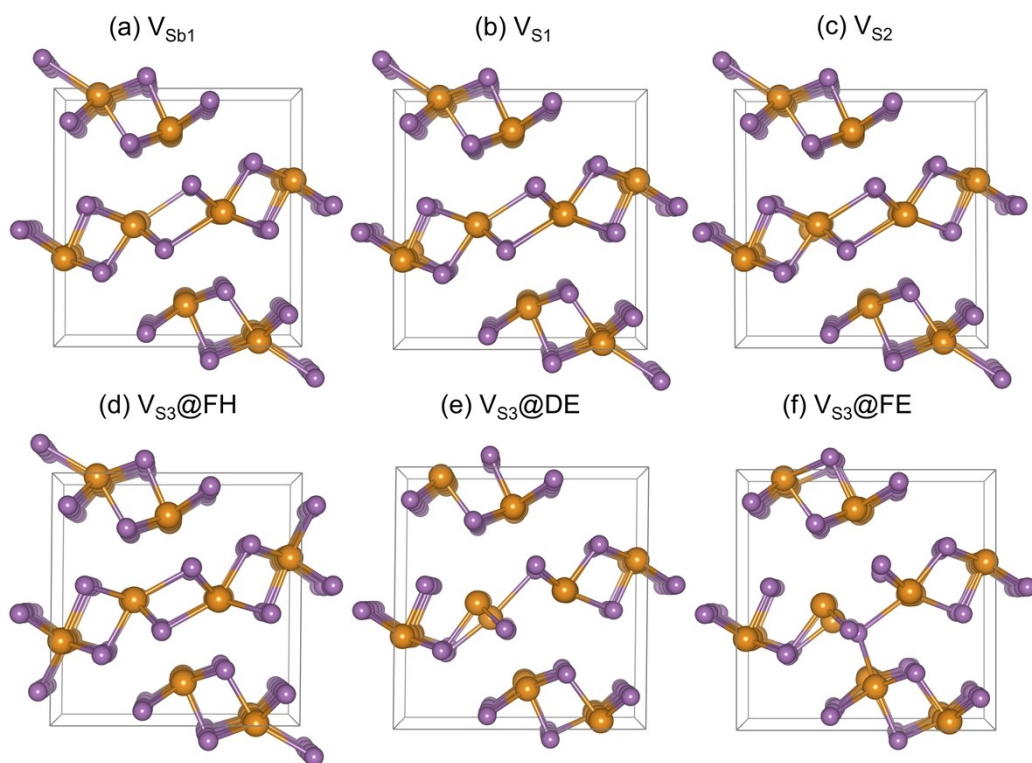

**Fig. S7** Top views of optimized geometries for  $V_{Sb1}$ ,  $V_{S1}$ ,  $V_{S2}$ ,  $V_{S3@FH}$ ,  $V_{S3@DE}$  and  $V_{S3@FE}$  systems. The Sb and S atoms are colored in orange and purple, respectively.

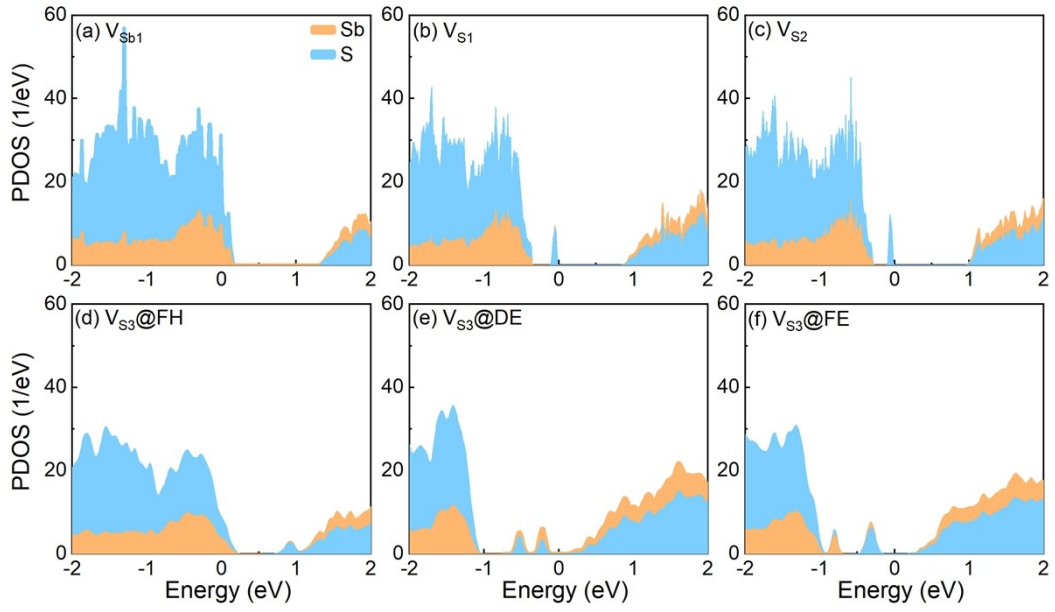

**Fig. S8.** Projected density of states (PDOS) of (a)  $V_{Sb1}$ , (b)  $V_{S1}$ , (c)  $V_{S2}$ , (d)  $V_{S3@FH}$ , (e)  $V_{S3@DE}$  and (f)  $V_{S3@FE}$  systems calculated using the PBE functional. Zero energy is set to the Fermi level.



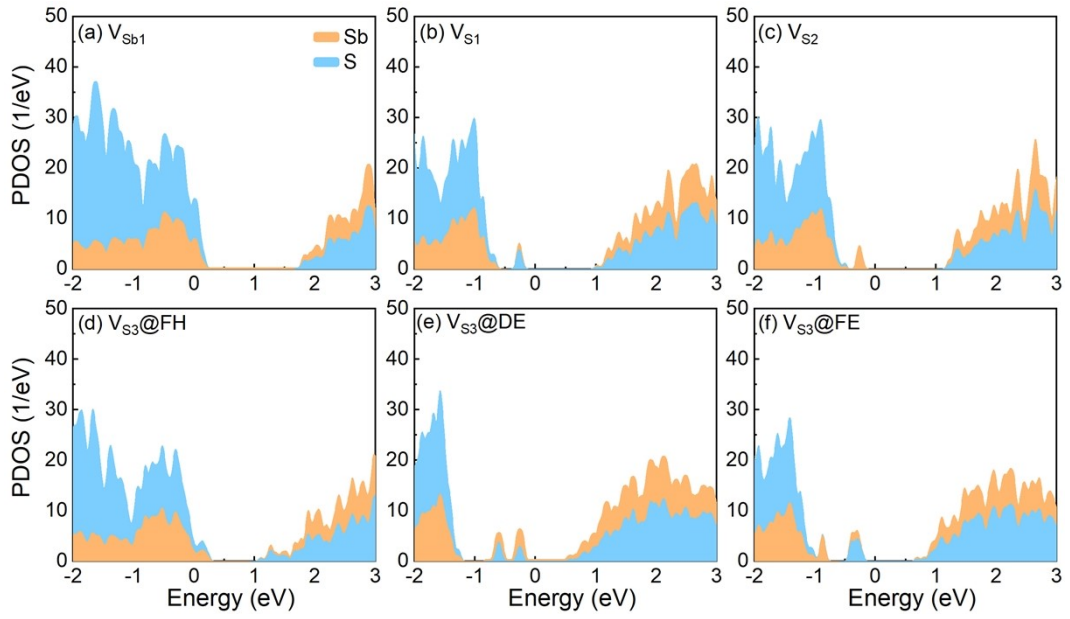

**Fig. S9.** Projected density of states (PDOS) of (a)  $V_{Sb1}$ , (b)  $V_{S1}$ , (c)  $V_{S2}$ , (d)  $V_{S3@FH}$ , (e)  $V_{S3@DE}$  and (f)  $V_{S3@FE}$  systems calculated using the HSE06 functional. Zero energy is set to the Fermi level.

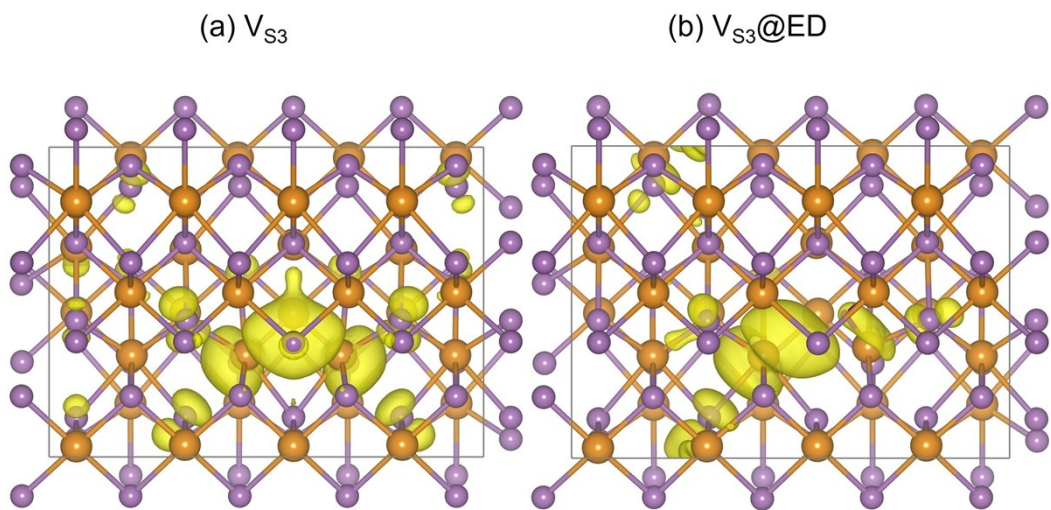

**Fig. S10.** Charge densities of the high charge density trap state in (a)  $V_{S3}$ , and (b)  $V_{S3}@ED$  systems.

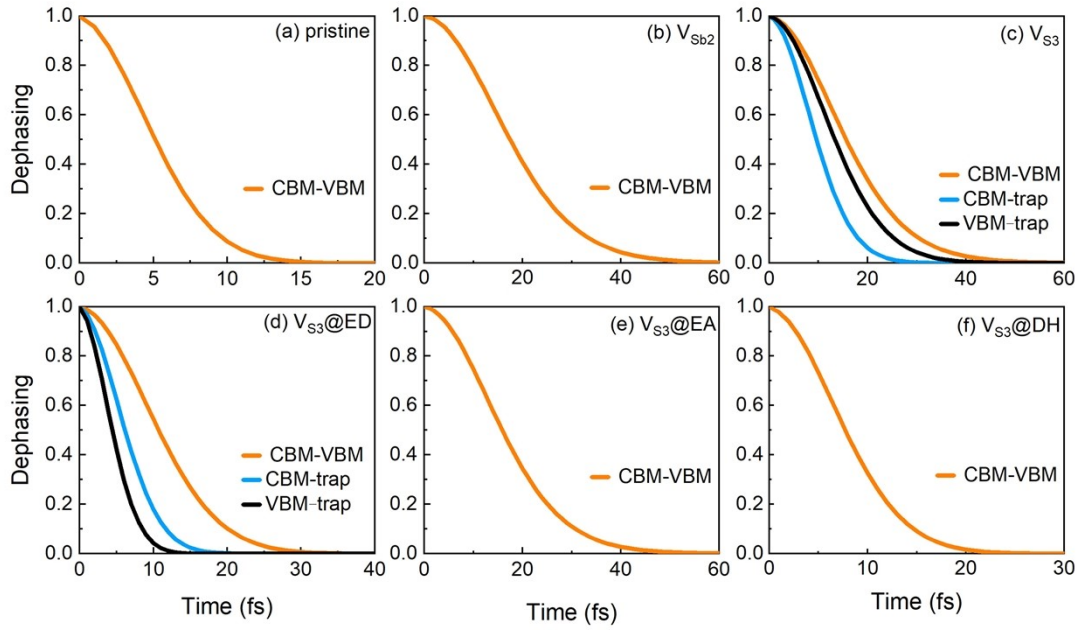

**Fig. S11.** Pure-dephasing functions for the key pairs of states for charge trapping and recombination in (a) pristine  $\text{Sb}_2\text{S}_3$ , (b)  $V_{\text{Sb}_2}$ , (c)  $V_{\text{S}_3}$ , (d)  $V_{\text{S}_3@ED}$ , (e)  $V_{\text{S}_3@EA}$  and (f)  $V_{\text{S}_3@DH}$  systems.
